# Supplementary material
Source: PubMed Central journal article supplement (PMC7338084)
Supplement: 159985_0_supp_506536_q8dl6d.pdf [file 159985_0_supp_506536_q8dl6d.pdf]

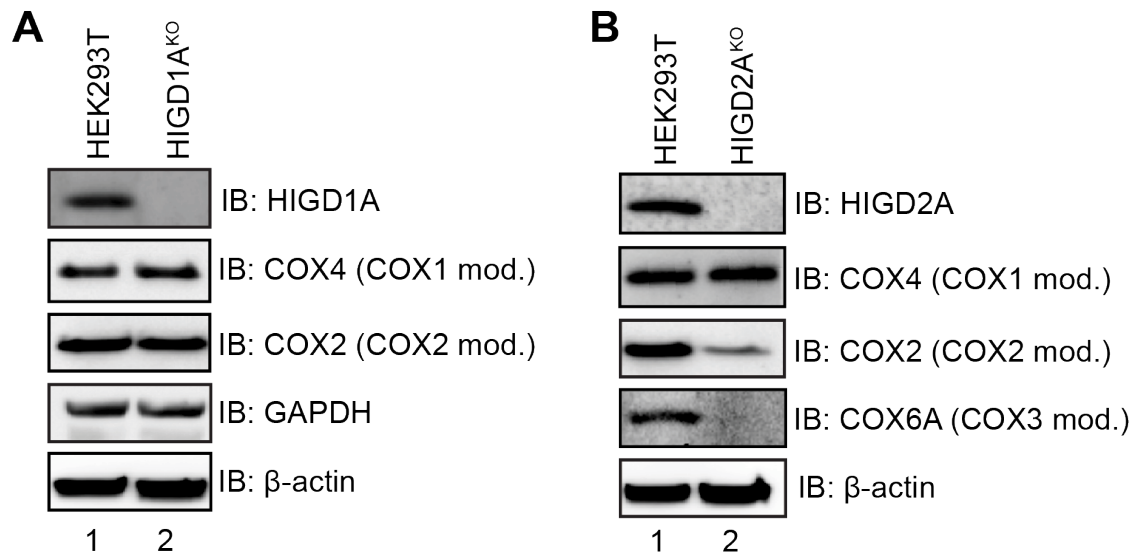

**Supplementary Figure S1.** Loss of HIGD2A leads to reduced levels of COX2 and COX6A. (A) HIGD1A<sup>KO</sup> cells were analyzed by SDS-PAGE and immunoblotting with the indicated antibodies. (B) HIGD2A<sup>KO</sup> cells were analyzed by SDS-PAGE and immunoblotting with the indicated antibodies. Mod., complex IV module.

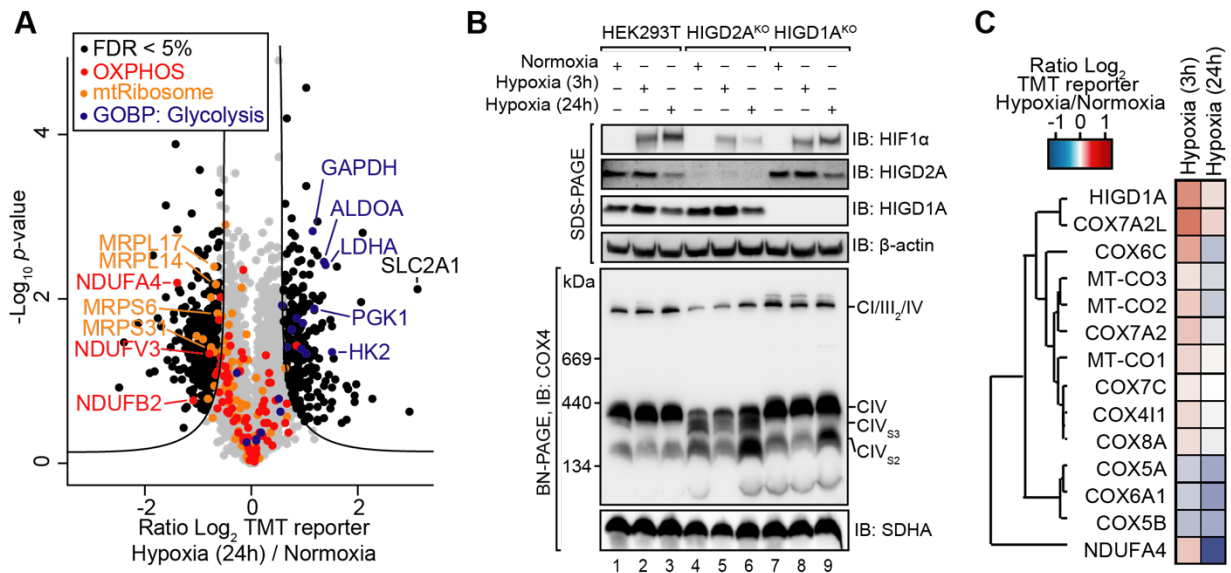

**Supplementary Figure S2.** Hypoxia induces HIGD1A but not HIGD2A. (A) Volcano plots depicting relative levels of cellular proteins in HEK293T cells following 24 h of growth under hypoxic conditions. Black dots and the curved line represent significantly altered protein abundance determined through a false discovery rate-based approach (5% FDR,  $s_0=1$ ).  $N=2$  independent subcultures. GOBP, proteins contained within the Gene Ontology: Biological Process category. (B) Cells were grown under normoxia and the hypoxic conditions for the indicated times. Cell lysates were analyzed by SDS- and BN-PAGE and immunoblotting with the indicated antibodies. (C) The relative levels of complex IV subunits in HEK293T cells following 3 or 24 h of growth in hypoxia were subjected to hierarchical clustering and presented as a heatmap.
